# Supplementary material for: Review article: Interdisciplinary Perspectives on Climate Sciences – Highlighting Past and Current Scientific Achievements
Source: Copernicus journal article supplement (doi:10.5194/npg-2023-19), 2023-10-10
Supplement: Supplementary file [file npg-2023-19-EC1-supplement.pdf]

The two referees of the paper have now submitted their evaluations. The first referee recommends acceptance of the paper, subject to a number of minor editing corrections. The second one (who has let his name known, and is Valerio Lucarini) recommends acceptance without further modification of the paper.

I intend as Editor to follow the referees' advice. But, before I can take a final decision, I must wait for the authors' final response. They have been requested to send it by 21 Feb 2024.

They should explain how they have dealt with the suggestions of the first referee.

And for a final remark, the proper (accented) spelling of names are as follows

- Ll. 150 and 164 (and maybe elsewhere, please check). Berangere → Bérangère (two accents, one acute, one grave)
  
- L. 186, Cecile → Cécile
  
- L. 211, Valerie → Valérie

I would suggest to make all these corrections. Now, from what I can see at link <https://sites.google.com/view/perspectivesonclimate/materials>, only Cécile Penland seems to have put there an accent on her name. So, I leave it to the authors to make the corrections or not.

I look forward to receiving the final version of the paper.
